# Supplementary material for: Protists in the Insect Rearing Industry: Benign Passengers or Potential Risk?
Source: MDPI journal article supplement (doi:10.3390/insects13050482), 2022-05-21
Supplement: s1 [file s1]

**Supplementary Table S1.** List of protist and microsporidia species naturally infecting reared insect hosts (from literature).

|                                    | <i>Acheta domesticus</i> | <i>Alphitobius diaperinus</i> | <i>Blaptica dubia</i> | <i>D. melanogaster</i> | <i>D. suzukii</i> | <i>Galleria mellonella</i> | <i>Gryllus bimaculatus</i> | <i>Locusta migratoria</i> | <i>M. domestica</i> | <i>Schistocerca gregaria</i> | <i>Tenebrio molitor</i> | <i>Zophobas morio</i> |
|------------------------------------|--------------------------|-------------------------------|-----------------------|------------------------|-------------------|----------------------------|----------------------------|---------------------------|---------------------|------------------------------|-------------------------|-----------------------|
| <b>Microsporidia</b>               |                          |                               |                       |                        |                   |                            |                            |                           |                     |                              |                         |                       |
| <b>Nosematidae</b>                 |                          |                               |                       |                        |                   |                            |                            |                           |                     |                              |                         |                       |
| <i>Paranosema grylli</i>           |                          |                               |                       |                        |                   |                            | x [16]                     |                           |                     |                              |                         |                       |
| <i>Paranosema locustae</i>         |                          |                               |                       |                        |                   |                            |                            | x [18,46]                 |                     |                              |                         |                       |
| <i>Nosema sp.</i>                  | x [78]                   |                               |                       |                        |                   |                            |                            | x [78]                    |                     |                              |                         |                       |
| <i>Vairimorpha apis</i>            |                          |                               |                       |                        |                   | x [115]                    |                            |                           |                     |                              |                         |                       |
| <i>Vairimorpha ceranae</i>         |                          |                               |                       |                        |                   | x [115]                    |                            |                           |                     |                              |                         |                       |
| <b>Tubulinoosematidae</b>          |                          |                               |                       |                        |                   |                            |                            |                           |                     |                              |                         |                       |
| <i>Tubulinoosema kingi</i>         |                          |                               |                       | x [184]                |                   |                            |                            |                           |                     |                              |                         |                       |
| <i>Tubulinoosema ratisbonensis</i> |                          |                               |                       | x [178,185]            |                   |                            |                            |                           |                     |                              |                         |                       |
| <i>Tubulinoosema suzukii</i>       |                          |                               |                       |                        | x [114]           |                            |                            |                           |                     |                              |                         |                       |
| <b>Uncertae Sedis</b>              |                          |                               |                       |                        |                   |                            |                            |                           |                     |                              |                         |                       |
| <i>Nosema galleriae</i>            |                          |                               |                       |                        |                   | x [186]                    |                            |                           |                     |                              |                         |                       |
| Microsporidia, indet.              |                          |                               |                       |                        |                   | x [46]                     |                            |                           |                     |                              |                         |                       |
| <i>Microsporidium grylli</i>       |                          |                               |                       |                        |                   |                            | x [17]                     |                           |                     |                              |                         |                       |
| <b>Gregarines</b>                  | x [78]                   |                               |                       |                        |                   |                            |                            | x [78]                    |                     |                              | x [78]                  |                       |
| <b>Eugregarinorida</b>             |                          |                               |                       |                        |                   |                            |                            |                           |                     |                              |                         |                       |
| <i>Gregarina acridiorum</i>        |                          |                               |                       |                        |                   |                            |                            | x [187]                   |                     |                              |                         |                       |
| <i>Gregarina polymorpha</i>        |                          |                               |                       |                        |                   |                            |                            |                           |                     |                              | x [62,188]              |                       |
| <i>Gregarina niphandroides</i>     |                          |                               |                       |                        |                   |                            |                            |                           |                     |                              | x [62,188]              |                       |
| <i>Gregarina garnhami</i>          |                          |                               |                       |                        |                   |                            |                            |                           |                     | x [187]                      |                         |                       |
| <i>Gregarina cuneata</i>           |                          |                               |                       |                        |                   |                            |                            |                           |                     |                              | x [62,188]              |                       |
| <i>Gregarina steini</i>            |                          |                               |                       |                        |                   |                            |                            |                           |                     |                              | x [188,189]             |                       |
| <i>Gregarina alphitobii</i>        |                          | x [190]                       |                       |                        |                   |                            |                            |                           |                     |                              |                         |                       |
| <i>Leidyana bimaculata</i>         |                          |                               |                       |                        |                   |                            | x [191]                    |                           |                     |                              |                         |                       |

|                             |        |         |         |  |  |  |         |                   |         |            |        |        |
|-----------------------------|--------|---------|---------|--|--|--|---------|-------------------|---------|------------|--------|--------|
| Eugregarines, indet.        |        |         |         |  |  |  | x [151] | x [46]            |         | x [46]     | x [46] | x [46] |
| <b>Neogregarinorida</b>     |        |         |         |  |  |  |         |                   |         |            |        |        |
| Schizogregarinina, indet.   |        |         |         |  |  |  |         |                   |         |            | x [46] | x [46] |
| <i>Mattesia</i> spp.        |        |         |         |  |  |  |         | x [46]            |         |            | x [46] |        |
| <i>Mattesia alphetobii</i>  |        | x [190] |         |  |  |  |         |                   |         |            |        |        |
| <b>Coccidia</b>             |        |         |         |  |  |  |         |                   |         |            |        |        |
| <b>Eucoccidiorida</b>       |        |         |         |  |  |  |         |                   |         |            |        |        |
| <i>Isospora</i> spp.        | x [78] |         |         |  |  |  |         | x [78]            |         |            | x [78] |        |
| <i>Adelina grylli</i>       |        |         |         |  |  |  | x [58]  |                   |         |            |        |        |
| <i>Cryptosporidium</i> spp. | x [78] |         |         |  |  |  |         | x [78]            | x [192] |            | x [78] |        |
| <b>Amoebozoa</b>            |        |         |         |  |  |  |         |                   |         |            |        |        |
| Amoeba, indet.              |        |         |         |  |  |  |         |                   |         |            | x [46] |        |
| <i>Entamoeba</i> spp.       |        |         | x [167] |  |  |  |         | x [78]            |         |            | x [78] |        |
| <i>Malamoeba locustae</i>   |        |         |         |  |  |  |         | x<br>[46,193,194] |         | x [46,194] |        |        |
| <b>Ciliophora</b>           |        |         |         |  |  |  |         |                   |         |            |        |        |
| <i>Balantidium</i> spp.     |        |         |         |  |  |  |         | x [78]            |         |            | x [78] |        |

**Supplementary Table S2.** Protist and microsporidia parasites used in successful experimental infection with reared insect species (from literature).

|                                        | <i>Acheta<br/>domesticus</i> | <i>Blaptica<br/>dubia</i> | <i>D.<br/>melanogaster</i> | <i>Galleria<br/>mellonella</i> | <i>Gryllus<br/>bimaculatus</i> | <i>Locusta<br/>migratoria</i> | <i>M. domestica</i> | <i>Shistocerca<br/>gregaria</i> | <i>Tenebrio<br/>molitor</i> | <i>Zophobas<br/>morio</i> |
|----------------------------------------|------------------------------|---------------------------|----------------------------|--------------------------------|--------------------------------|-------------------------------|---------------------|---------------------------------|-----------------------------|---------------------------|
| <b>Microsporidia</b>                   |                              |                           |                            |                                |                                |                               |                     |                                 |                             |                           |
| <b>Nosematidae</b>                     |                              |                           |                            |                                |                                |                               |                     |                                 |                             |                           |
| <i>Paranosema whitei</i>               |                              |                           |                            | x [195]                        |                                |                               |                     |                                 | x [195]                     |                           |
| <i>Paranosema locustae</i>             |                              |                           |                            |                                |                                |                               |                     | x [196,197]                     |                             |                           |
| <i>Vairimorpha necatrix</i>            |                              |                           |                            | x [198]                        |                                |                               |                     |                                 |                             |                           |
| <i>Vairimorpha<br/>heterosporum</i>    |                              |                           |                            | x [199]                        |                                |                               |                     |                                 |                             |                           |
| <i>Vairimorpha apis</i>                |                              |                           |                            | x [147]                        |                                |                               |                     |                                 |                             |                           |
| <i>Vairimorpha ceranae</i>             |                              |                           |                            | x [147]                        |                                |                               |                     |                                 |                             |                           |
| <b>Tubulinosematidae</b>               |                              |                           |                            |                                |                                |                               |                     |                                 |                             |                           |
| <i>Tubulinosema spp.</i>               |                              |                           |                            | x [146]                        |                                |                               |                     |                                 |                             |                           |
| <i>Anncaliia algerae</i>               |                              |                           |                            | x [199]                        |                                |                               |                     |                                 |                             |                           |
| <i>Tubulinosema kingi</i>              |                              |                           | x [176,200–<br>202]        |                                |                                |                               |                     |                                 |                             |                           |
| <i>Tubulinosema<br/>ratisbonensis</i>  |                              |                           | [137]                      |                                |                                |                               |                     |                                 |                             |                           |
| <b>Chlorophyta</b>                     |                              |                           |                            |                                |                                |                               |                     |                                 |                             |                           |
| <i>Helicosporidium spp.</i>            |                              |                           |                            | x [96]                         |                                |                               | x [96]              |                                 |                             |                           |
| <i>Helicosporidium<br/>parasiticum</i> |                              |                           |                            | x [85,93]                      |                                |                               | x [85]              |                                 |                             |                           |
| <b>Gregarines</b>                      |                              |                           |                            |                                |                                |                               |                     |                                 |                             |                           |
| <b>Eugregarinorida</b>                 |                              |                           |                            |                                |                                |                               |                     |                                 |                             |                           |
| <i>Gregarina garnhami</i>              |                              |                           |                            |                                |                                |                               |                     | x [203]                         |                             |                           |
| <i>Gregarina niphandrodes</i>          |                              |                           |                            |                                |                                |                               |                     |                                 | x [68]                      |                           |
| <i>Gregarina polymorpha</i>            |                              |                           |                            |                                |                                |                               |                     |                                 | x [204]                     |                           |
| <b>Neogregarinorida</b>                |                              |                           |                            |                                |                                |                               |                     |                                 |                             |                           |
| <i>Mattesia spp.</i>                   |                              |                           |                            | x [205]                        |                                |                               |                     |                                 |                             |                           |

|                           |  |  |  |  |  |  |  |        |  |  |
|---------------------------|--|--|--|--|--|--|--|--------|--|--|
| <b>Amoebozoa</b>          |  |  |  |  |  |  |  |        |  |  |
| <i>Malamoeba locustae</i> |  |  |  |  |  |  |  | x [43] |  |  |
